# Supplementary material for: Statistical significance of cis-regulatory modules
Source: Springer Nature journal article supplement (doi:10.1186/1471-2105-8-19), 2007-01-22
Supplement: Additional file 2 [file 1471-2105-8-19-s2.pdf]

## IFN- $\beta$ Enhancer

The IFN- $\beta$  enhancer consists of binding sites for HMGI, ATF-2/c-Jun, IRF-1 and NF- $\kappa$ B proteins [1, 2, 3]. The binding sites for many of these factors are overlapping in the module, however, so we chose to construct a module out of four motif profiles: a modified ATF-2/c-Jun profile, two IRF-1 profiles and an NF- $\kappa$ B profile. The modified ATF-2/c-Jun profile was created by combining a profile for c-Jun in TRANSFAC [4] (M00041) with a profile for ATF-2 in TRANSFAC (M00040). The two IRF-1 profiles were constructed by modifying a profile for IRF in JASPAR [5] (MA0050). The profile used for NF- $\kappa$ B was from JASPAR (MA0061). The order of the motifs was selected as the order reported by Thanos [1]. The spacings between the individual factors as well as the individual motif  $p$ -values were learned on the human IFN-B promoter. A cartoon of this module is shown in Figure 1. The module file that was used is also given at <http://rulai.cshl.edu/storm/SupplementaryMaterial>.

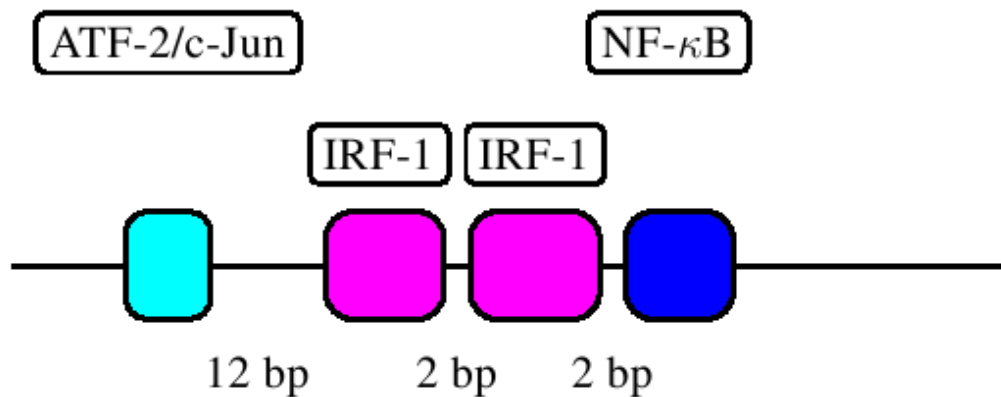

Figure 1: The module used to scan for IFN- $\beta$  occurrences. Consists of a modified ATF-2/c-Jun profile, two IRF-1 profiles and an NF- $\kappa$ B profile. The distance allowed between any two sites are listed below the spacings.

The  $(g, k)$ -table used was built from all human promoters from the CSHL mammalian promoter database with sequence spanning -500 to +100 w.r.t TSS, with  $k = 6$  and  $g = 5$ .

## References

- [1] Thanos D: **Mechanisms of Transcriptional Synergism of Eukaryotic Genes, The Interferon- Paradigm.** *Hypertension* 1996, **27**:1025–1029.
- [2] Struhl K: **A Paradigm for Precision.** *Science* 2001, **293**:1054–1055.
- [3] Munshi N, Yie J, Senger K, Lomvardas S, Agalioti T, Thanos D: **The IFN- $\beta$  Enhancer: A Paradigm for Understanding Activation and Repression of Inducible Gene Expression.** *Cold Spring Harbor Symposia on Quantitative Biology* 1999, **LXIV**:149–159.
- [4] Matys V, Kel-Margoulis OV, Fricke E, Liebich I, Land S, Barre-Dirrie A, Reuter I, Chekmenev D, Krull M, Hornischer K, Voss N, Stegmaier P, Lewicki-Potapov B, Saxel H, Kel AE, E W: **TRANSFAC and its module TRANSCOMPLE: transcriptional gene regulation in eukaryotes.** *Nucleic Acids Research* 2006, **34**:D108–110.
- [5] Sandelin A, Alkema W, Engström P, Wasserman WW, Lenhard B: **JASPAR: an open access database for eukaryotic transcription factor binding profiles.** *Nucleic Acids Research* 2004, **32**:D91–D94.
